# Supplementary material for: Quantitative Structure–Mutation–Activity Relationship Tests (QSMART) model for protein kinase inhibitor response prediction
Source: Springer Nature journal article supplement (doi:10.1186/s12859-020-03842-6), 2020-11-12
Supplement: 12859_2020_3842_MOESM1_ESM.pdf [file 12859_2020_3842_MOESM1_ESM.pdf]

## RESEARCH ARTICLE

# Quantitative Structure-Mutation-Activity Relationship Tests (QSMART) Model for Protein Kinase Inhibitor Response Prediction

Liang-Chin Huang<sup>1</sup>, Wayland Yeung<sup>1</sup>, Ye Wang<sup>2</sup>, Huimin Cheng<sup>2</sup>, Aarya Venkat<sup>3</sup>, Sheng Li<sup>4</sup>, Ping Ma<sup>2</sup>, Khaled Rasheed<sup>4</sup> and Natarajan Kannan<sup>1,3\*</sup>

## Supplementary Results

### Residual analysis

Residual analysis was then performed to assess the appropriateness of our prediction models. The residual plots for all the 23 cancer types (Figure S3) show no specific U shape, inverted U shape, or funnel shape, which means our prediction models need no more higher-order features to capture drug response variation.

**Analysis of the feature prioritization in feature screening**  
Considering the explainabilities of drug features, we prioritized them when we performed feature screening. Because it was a drug response-independent pre-process, the screening result (92 fingerprints and no chemical descriptors) did not indicate that chemical descriptors were not informative for drug response prediction. Instead, it was the consequence of the high collinearity among drug features and our prioritization. We reversed our prioritization and performed an additional experiment to investigate the result of feature screening. As a result, four fingerprints and 29 chemical descriptors remained (Table S10). Since high multicollinearity exists among the raw drug features, either screening result can be representative of the raw drug features, but the 92 fingerprints illuminate the “black box” between feature and response.

### Contribution of different feature categories

To roughly estimate the contribution of different feature types to the prediction accuracy, we split the features into three categories: drug features, cancer cell line features, and interaction terms. We used the same neural network architecture (the number of nodes in the first and second hidden layers) in each cancer-centric model, and then built prediction models using

the split feature sets. Across the 23 cancer types, this experiment showed that using drug features alone to predict PKI response outperformed using cancer cell line features or interaction terms alone (overall  $R^2 = 0.661, 0.126, \text{ and } 0.152$ , respectively; Table S11). The contribution of interaction terms to prediction performance was significant (p-value = 0.0041, Wilcoxon signed-rank test) in comparison to cancer cell line features. Although it was partially due to the number of selected drug features being more than those of the other two feature categories, the main reason was that the drug features were more informative in cancer-centric models. Since the entire training dataset was split into 23 cancer-centric datasets, the similarity among cancer cell lines in one dataset was higher than the similarity among PKIs. Thus, the drug features had higher variation and higher entropy.

Assuming that the features from different categories in a full model are independent and can explain the variation of drug response independently, the summation of the prediction performances of split models (the  $R^2_{SSP}$  in Table S11) would ideally be the upper limit of a full model. However, Table S11 shows that the prediction performances  $R^2_{Full}$  are even higher than  $R^2_{SSP}$  for 14 cancer types, which implies that the synergistic prediction performances ( $R^2_{Full} - R^2_{SSP}$ ) are potentially derived from the higher-order interactions performed by neural networks. Interestingly, we found that the neural network architectures with the top four synergistic effects are double-layer neural networks instead of single-layer neural networks. It supports our hypothesis that synergistic prediction performance is derived from higher-order interactions.

### Prediction performance for different PKI target groups

Some previous studies [1, 2] built both drug-centric and cancer-centric models to predict drug response. However, since our study focused on investigating drug-mutation relationships, we did not build drug-centric models. If we apply the framework in our study to a single drug, all the drug features will be the same

\*Correspondence: nkannan@uga.edu

<sup>1</sup> Institute of Bioinformatics, University of Georgia, 120 Green St., 30602, Athens, GA, USA

<sup>3</sup> Department of Biochemistry and Molecular Biology, 120 Green St., 30602, Athens, GA, USA

Full list of author information is available at the end of the article

across different drug response samples. Thus no significant drug features nor significant interaction terms will be captured. Nevertheless, we were still interested in the prediction performances for different drugs. The prediction model having the best validation performance across the 10-fold cross-validation was chosen as the final model for each cancer type. We used the model to predict drug response for the entire training set and then gathered prediction results for each PKI. We pooled the results of PKIs according to their target groups (Additional file 4) into nine sets: AGC, CAMK, CK1, CMGC, STE, TK, TKL, Other, and Atypical. One PKI response prediction might be pooled in one or multiple sets since one PKI may have one or more drug targets classified as different protein kinase groups. We first analyzed the average actual  $IC_{50}$  in different PKI target group sets. The result showed that if a drug inhibits CMGC, CAMK, or AGC protein kinases, it has higher average  $IC_{50}$  values for most cancer types (average  $IC_{50} = 2.527, 2.389, \text{ and } 2.331$ , respectively. Figure S4a). Contrarily, if a drug inhibits Atypical and CK1 protein kinases, it has lower average  $IC_{50}$  values (1.624 and 1.679, respectively). This result was according to the data we collected from GDSC, and it might not be applied to all the cases. Figure S4b shows the detailed performances evaluated by  $R^2$ . To our surprise, we found the best is Atypical group ( $R^2 = 0.699$  to  $0.901$  and overall  $R^2 = 0.872$ ) and the worst is CAMK group ( $R^2 = 0.644$  to  $0.885$  and overall  $R^2 = 0.785$ ).

Although atypical protein kinases lack canonical protein kinase domains, the models could still predict atypical protein kinase inhibitor responses well. We speculated that the performance was supported by independent drug features, cancer cell line features, or the drug-mutation relationships from unknown off-targets. The mammalian target of rapamycin (mTOR), classified as Atypical group, is another potential factor to explain this result. mTOR regulates cell growth, proliferation, motility, and survival [3], and it is highly mutated in the cancer cell lines in our dataset: 67 out of 837 cell lines (8%) have mTOR mutations. Since it is critical to cell activity, the six drugs that inhibit mTOR (listed in Additional file 4) might require less concentration to inhibit the cancer cell line's activity. Moreover, since mTOR is implicated in a broad category of pathways, each of its mutations provides more information about the sample's cancer cell line features to the prediction models. On the contrary, although the CAMK group proteins have canonical protein kinase domains, the models could not predict CAMK inhibitor responses well. We conjectured that this was because none of the PKIs in our dataset specifically inhibit CAMK group

proteins so that the models were not tailored to capture CAMK inhibitor-specific features and interaction terms. Although there are 33 CAMK inhibitors in our dataset (Additional file 4), all of them had at least one more target classified as other groups. Compared to CAMK inhibitors, atypical PKIs had relatively higher specificity in this point of view. There are 29 atypical PKIs in our dataset, and 8 of them (27.6%) only inhibit their targets classified as Atypical group.

**More explanations about the features in the case study**  
In addition to the features explained in the main article, we choose more features and explain their biological relevance to the NSCLC case study.

#### *Gene-level feature*

“CNV\_ROCK2\_gain”. This feature represents if Rho-associated protein kinase 2 (ROCK2) is either neutral or deleted in a cancer cell line (0, copy number losses) or amplified (1, copy number gains). ROCK2 is known to be essential for NSCLC's growth and invasion [4]. In the NSCLC dataset, ROCK2 is amplified in two cell lines: LC-1/sq and NCI-H1623; the latter's source was from a patient with metastatic NSCLC. On average, the PKI responses involved in the cell lines with neutral or deleted ROCK2 showed lower  $IC_{50}$  value than those with amplified ROCK2 (average actual  $IC_{50} = 2.71$  vs. 3.49). By using the pre-trained model, however, when the value of CNV\_ROCK2\_gain was replaced from 0 to 1 when other features were held constant, the estimated  $IC_{50}$  decreased 0.14 on average (average predicted  $IC_{50} = 2.71$  vs. 2.57). Although the coefficient of CNV\_ROCK2\_gain obtained from Lasso feature selection was 0.07, meaning it positively correlated to  $IC_{50}$ , the neural network model had not perfectly learned this trend.

#### *Pathway-level feature*

“REC\_R\_HSA\_176298”. This feature shows the number of mutations in the proteins implicating in the reaction “Activation of claspin” (Reactome ID: R-HSA-176298). Claspin is an essential regulator for checkpoint kinase 1 (Chk1) activation, and it was found to be associated with regulating breast cancer proliferation [5, 6] and contributing to lung cancer radioresistance [7]. Interestingly, this feature was also selected in our PKI response prediction model for breast cancer cell lines. On average, the NSCLC cell lines without mutations related to claspin activation had lower PKI responses than those with mutations related to this reaction (average actual  $IC_{50} = 2.66$  vs. 3.27). Based on the pre-trained neural network model and our NSCLC dataset, every unit increase in REC\_R\_HSA\_176298 is associated with a 0.52 unit increase in  $IC_{50}$  on average (average predicted  $IC_{50} = 2.73$  vs. 3.25).

### *Understudied protein-protein interaction*

CDK13, an understudied protein kinase defined by NIH Illuminating the Druggable Genome program (IDG) [8] (Additional file 5, last updated on June 11, 2019), participates in a 4-clique PPI module in the TP53-centric subnetwork (Figure 3). Its three PPIs in this module are all the features of the NSCLC-specific model. One of CDK13's PPI partners, AKAP4, is a biomarker for NSCLC, and its expression increase was associated with tumor stage [9]. In addition to NSCLC, AKAP4 is also a potential therapeutic target of colorectal cancer [10] and ovarian cancer [11], and it regulates the expression of the CDK family. In the NSCLC dataset, the expression of CDK13-AKAP4 interaction had a weak positive correlation with IC<sub>50</sub> (Pearson correlation = 0.07); in the prediction model, every unit of gene expression level increase in CDK13-AKAP4 PPI is associated with a 0.017 unit increase in IC<sub>50</sub> on average (average predicted IC<sub>50</sub> = 2.727 vs. 2.744).

A-kinase anchor protein 4 (AKAP4) a promising therapeutic target of colorectal cancer. *J. Exp. Clin. Cancer Res.* **34**, 142 (2015)

11. Kumar, V., Jagadish, N., Suri, A.: Role of A-Kinase anchor protein (AKAP4) in growth and survival of ovarian cancer cells. *Oncotarget* **8**(32), 53124–53136 (2017)

### Author details

<sup>1</sup> Institute of Bioinformatics, University of Georgia, 120 Green St., 30602, Athens, GA, USA. <sup>2</sup> Department of Statistics, University of Georgia, 310 Herty Drive, 30602, Athens, GA, USA. <sup>3</sup> Department of Biochemistry and Molecular Biology, 120 Green St., 30602, Athens, GA, USA. <sup>4</sup> Department of Computer Science, 415 Boyd Graduate Studies Research Center, 30602, Athens, GA, USA.

### References

1. Chang, Y., Park, H., Yang, H.J., Lee, S., Lee, K.Y., Kim, T.S., Jung, J., Shin, J.M.: Cancer Drug Response Profile scan (CDRscan): A Deep Learning Model That Predicts Drug Effectiveness from Cancer Genomic Signature. *Sci Rep* **8**(1), 8857 (2018)
2. Liu, H., Zhao, Y., Zhang, L., Chen, X.: Anti-cancer Drug Response Prediction Using Neighbor-Based Collaborative Filtering with Global Effect Removal. *Mol Ther Nucleic Acids* **13**, 303–311 (2018)
3. Hay, N., Sonenberg, N.: Upstream and downstream of mTOR. *Genes Dev.* **18**(16), 1926–1945 (2004)
4. Vigil, D., Kim, T.Y., Plachco, A., Garton, A.J., Castaldo, L., Pachter, J.A., Dong, H., Chen, X., Tokar, B., Campbell, S.L., Der, C.J.: ROCK1 and ROCK2 are required for non-small cell lung cancer anchorage-independent growth and invasion. *Cancer Res.* **72**(20), 5338–5347 (2012)
5. Lin, S.Y., Li, K., Stewart, G.S., Elledge, S.J.: Human Claspin works with BRCA1 to both positively and negatively regulate cell proliferation. *Proc. Natl. Acad. Sci. U.S.A.* **101**(17), 6484–6489 (2004)
6. Verlinden, L., Vanden Bempt, I., Eelen, G., Drijckoningen, M., Verlinden, I., Marchal, K., De Wolf-Peeters, C., Christiaens, M.R., Michiels, L., Bouillon, R., Verstuyl, A.: The E2F-regulated gene Chk1 is highly expressed in triple-negative estrogen receptor /progesterone receptor /HER-2 breast carcinomas. *Cancer Res.* **67**(14), 6574–6581 (2007)
7. Choi, S.H., Yang, H., Lee, S.H., Ki, J.H., Nam, D.H., Yoo, H.Y.: TopBP1 and Claspin contribute to the radioresistance of lung cancer brain metastases. *Mol. Cancer* **13**, 211 (2014)
8. the Druggable Genome, I.: Understudied Proteins. <https://commonfund.nih.gov/idg/understudiedproteins>. Accessed: 2019-06-11 (2019)
9. Gumireddy, K., Li, A., Chang, D.H., Liu, Q., Kossenkov, A.V., Yan, J., Korst, R.J., Nam, B.T., Xu, H., Zhang, L., Ganepola, G.A., Showe, L.C., Huang, Q.: AKAP4 is a circulating biomarker for non-small cell lung cancer. *Oncotarget* **6**(19), 17637–17647 (2015)
10. Jagadish, N., Parashar, D., Gupta, N., Agarwal, S., Purohit, S., Kumar, V., Sharma, A., Fatima, R., Topno, A.P., Shaha, C., Suri, A.:

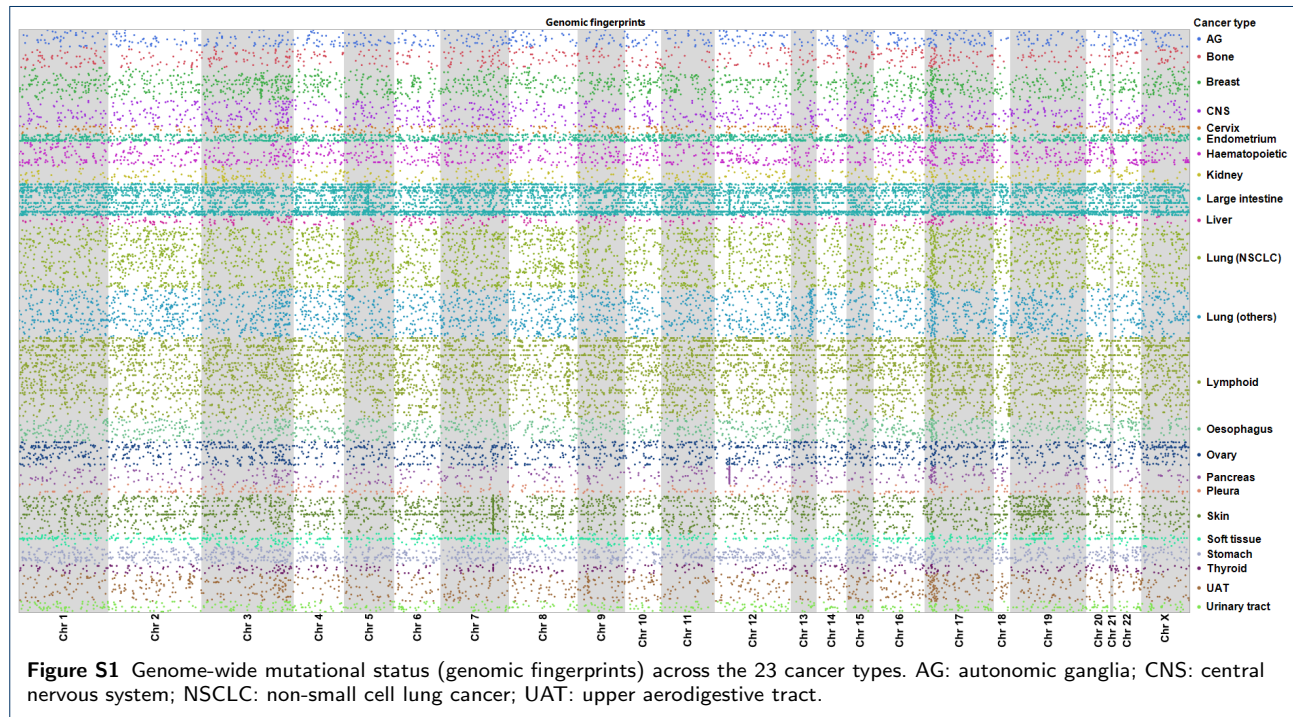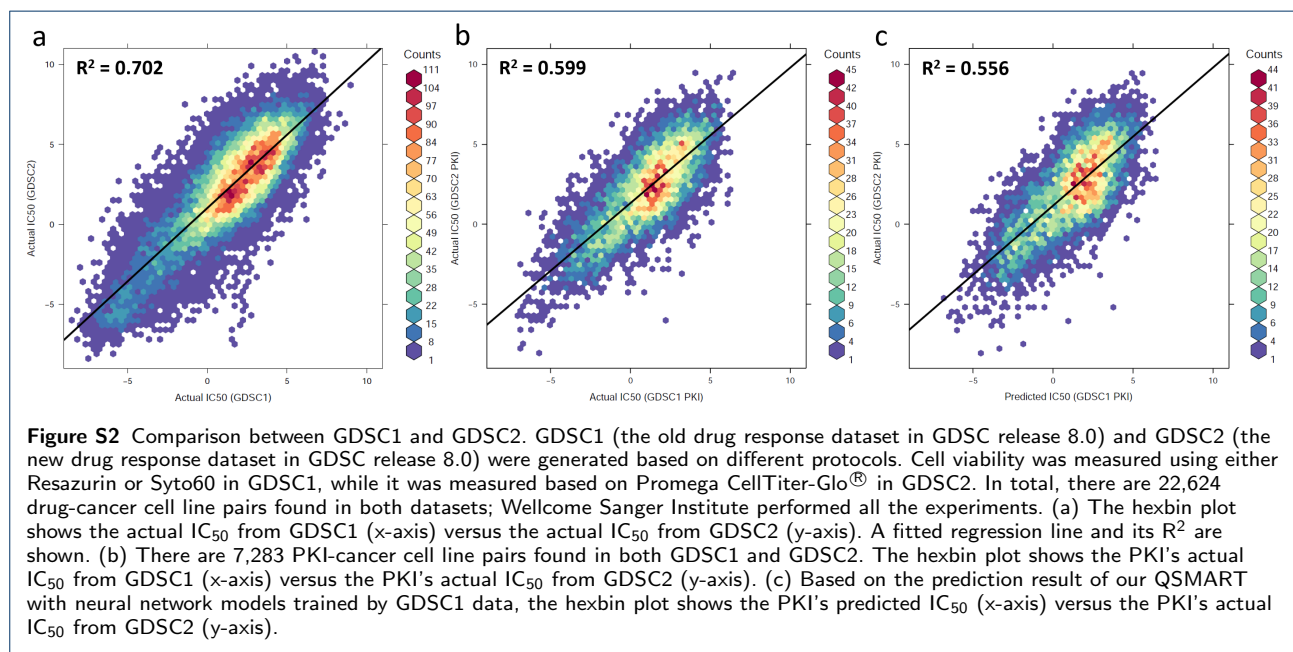

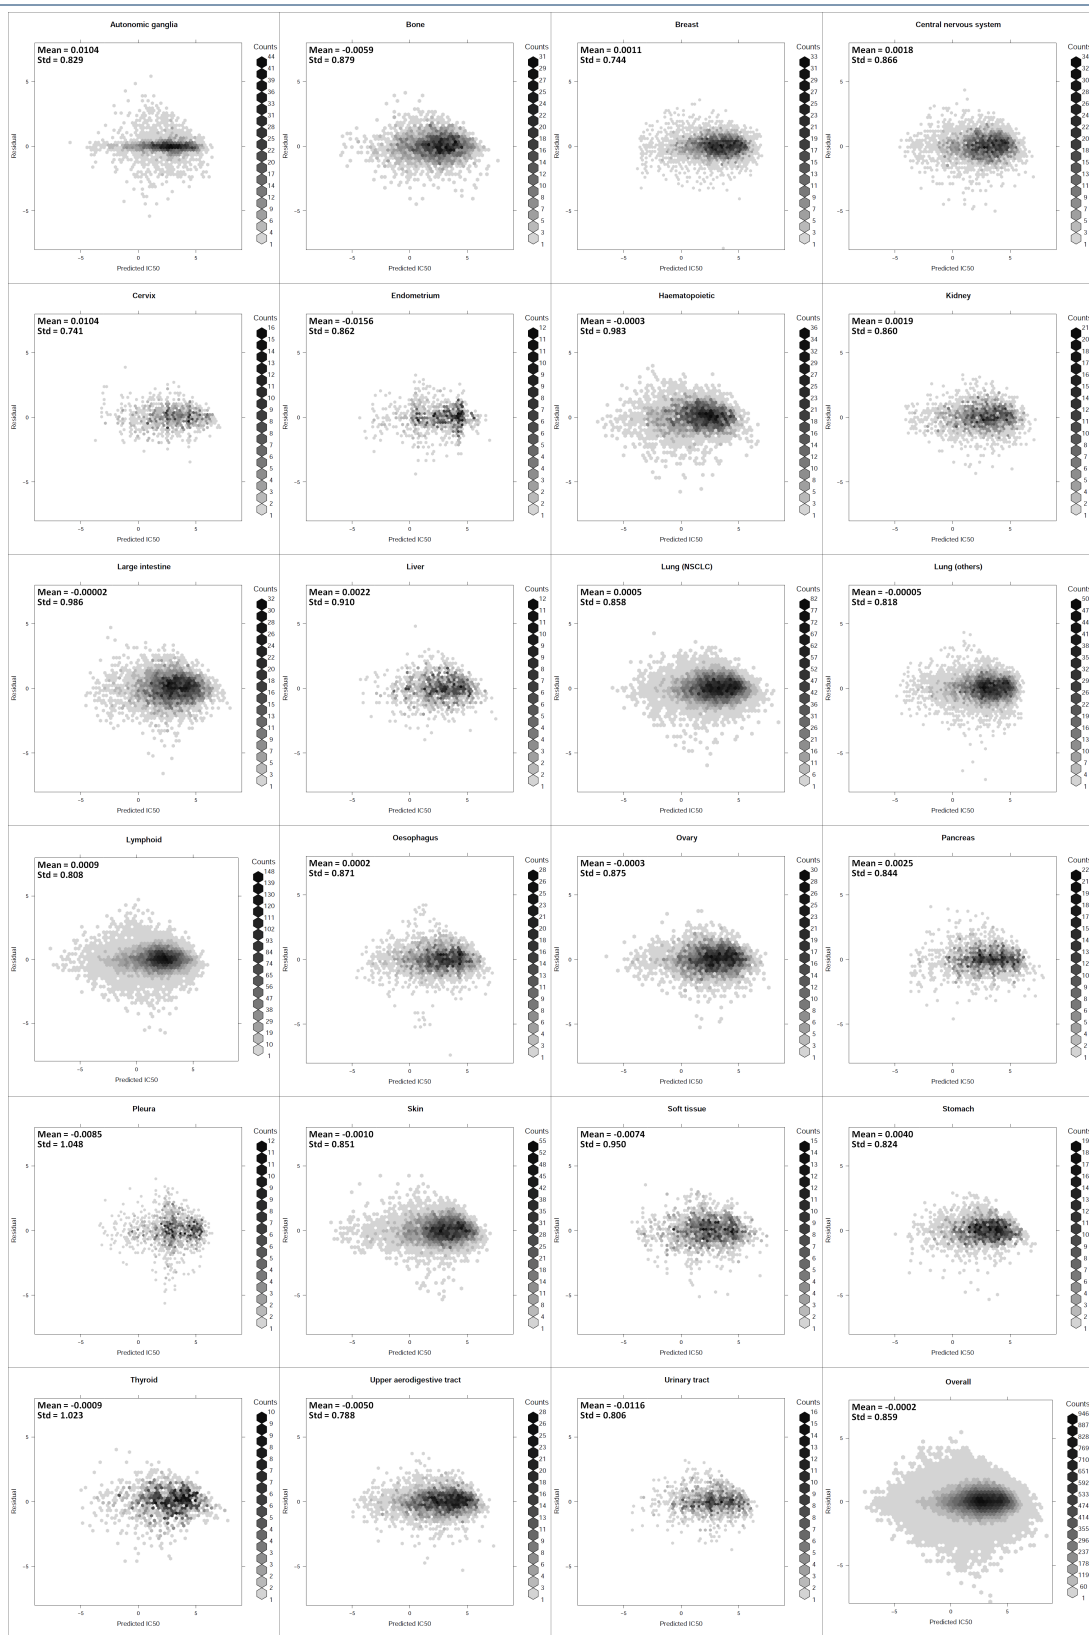

**Figure S3** Residual analyses for 23 cancer-centric models and the overall result. X-axis: predicted IC<sub>50</sub>; y-axis: residuals, defined as actual IC<sub>50</sub> minus predicted IC<sub>50</sub>. Residuals mean and standard deviation are shown for each cancer type.

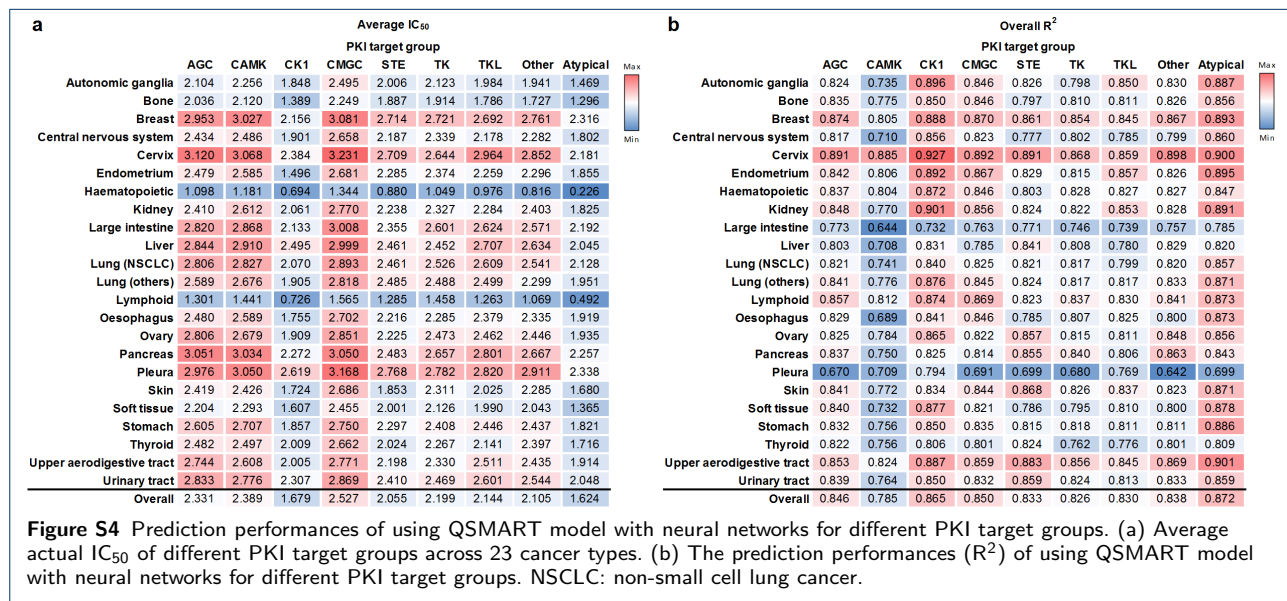

**Table S1** Number of features at different feature levels and the prediction performance of neural networks

| Cancer type     | #IC <sub>50</sub> | #All Features | #Drug Features | #Cancer cell line features |       |        |      |        |         |        | #Interaction terms |     |      |      |     | #Nodes |     | #Tours | Performance    |       |       |
|-----------------|-------------------|---------------|----------------|----------------------------|-------|--------|------|--------|---------|--------|--------------------|-----|------|------|-----|--------|-----|--------|----------------|-------|-------|
|                 |                   |               |                | Residue                    | Motif | Domain | Gene | Family | Pathway | Sample | DxM                | PPI | REcx | PWYx | GOx | 1st    | 2nd |        | R <sup>2</sup> | RMSE  | AUC   |
| AG              | 2971              | 62            | 31             | 0                          | 0     | 0      | 6    | 3      | 0       | 0      | 4                  | 18  | 0    | 0    | 0   | 62     | 8   | 200    | 0.879          | 0.688 | 0.978 |
| Bone            | 3410              | 84            | 52             | 0                          | 1     | 0      | 1    | 0      | 11      | 0      | 4                  | 11  | 0    | 3    | 1   | 10     | 0   | 300    | 0.856          | 0.812 | 0.984 |
| Breast          | 4706              | 129           | 70             | 5                          | 0     | 1      | 10   | 0      | 15      | 0      | 12                 | 6   | 1    | 5    | 4   | 26     | 6   | 200    | 0.880          | 0.714 | 0.986 |
| CNS             | 4250              | 114           | 65             | 0                          | 0     | 0      | 9    | 1      | 12      | 1      | 11                 | 6   | 1    | 4    | 4   | 11     | 0   | 300    | 0.858          | 0.785 | 0.980 |
| Cervix          | 1044              | 37            | 29             | 0                          | 0     | 0      | 2    | 0      | 1       | 0      | 1                  | 4   | 0    | 0    | 0   | 7      | 0   | 200    | 0.864          | 0.770 | 0.989 |
| Endometrium     | 1073              | 33            | 21             | 0                          | 0     | 0      | 0    | 0      | 3       | 1      | 4                  | 3   | 0    | 0    | 1   | 11     | 4   | 200    | 0.878          | 0.733 | 0.982 |
| Haematopoietic  | 4204              | 119           | 58             | 3                          | 0     | 2      | 9    | 0      | 13      | 0      | 28                 | 2   | 0    | 0    | 4   | 11     | 0   | 200    | 0.858          | 0.906 | 0.971 |
| Kidney          | 2458              | 73            | 51             | 0                          | 0     | 0      | 1    | 0      | 1       | 1      | 0                  | 17  | 1    | 0    | 1   | 9      | 0   | 200    | 0.836          | 0.877 | 0.986 |
| Large intestine | 4628              | 141           | 53             | 10                         | 1     | 1      | 4    | 0      | 8       | 0      | 50                 | 10  | 1    | 3    | 0   | 12     | 0   | 300    | 0.814          | 0.923 | 0.974 |
| Liver           | 1348              | 48            | 35             | 0                          | 0     | 0      | 0    | 2      | 2       | 0      | 2                  | 6   | 0    | 0    | 1   | 7      | 0   | 200    | 0.836          | 0.844 | 0.985 |
| Lung (NSCLC)    | 9205              | 207           | 72             | 7                          | 0     | 0      | 9    | 4      | 21      | 1      | 47                 | 27  | 1    | 3    | 15  | 15     | 0   | 200    | 0.854          | 0.809 | 0.982 |
| Lung (others)   | 7206              | 162           | 58             | 2                          | 0     | 0      | 3    | 1      | 11      | 1      | 46                 | 23  | 0    | 4    | 13  | 30     | 6   | 200    | 0.859          | 0.756 | 0.983 |
| Lymphoid        | 13302             | 291           | 72             | 54                         | 0     | 2      | 11   | 1      | 14      | 2      | 86                 | 39  | 4    | 0    | 6   | 18     | 0   | 300    | 0.873          | 0.757 | 0.980 |
| Oesophagus      | 3337              | 91            | 58             | 0                          | 0     | 0      | 8    | 0      | 9       | 0      | 4                  | 9   | 0    | 1    | 2   | 10     | 0   | 200    | 0.841          | 0.857 | 0.972 |
| Ovary           | 3502              | 113           | 64             | 2                          | 0     | 1      | 9    | 3      | 5       | 0      | 9                  | 17  | 1    | 0    | 2   | 11     | 0   | 200    | 0.844          | 0.867 | 0.987 |
| Pancreas        | 2421              | 84            | 60             | 0                          | 0     | 1      | 2    | 1      | 3       | 0      | 0                  | 13  | 0    | 3    | 1   | 10     | 0   | 200    | 0.833          | 0.877 | 0.990 |
| Pleura          | 1431              | 36            | 23             | 0                          | 1     | 2      | 2    | 0      | 0       | 0      | 0                  | 8   | 0    | 0    | 0   | 11     | 4   | 200    | 0.805          | 0.894 | 0.966 |
| Skin            | 5732              | 132           | 64             | 9                          | 0     | 1      | 7    | 0      | 13      | 0      | 15                 | 15  | 0    | 3    | 5   | 12     | 0   | 200    | 0.875          | 0.810 | 0.987 |
| Soft tissue     | 1938              | 63            | 45             | 0                          | 1     | 0      | 1    | 1      | 7       | 0      | 2                  | 5   | 0    | 1    | 0   | 8      | 0   | 200    | 0.818          | 0.941 | 0.975 |
| Stomach         | 2327              | 83            | 49             | 0                          | 0     | 0      | 8    | 1      | 4       | 0      | 16                 | 5   | 0    | 0    | 0   | 20     | 5   | 200    | 0.836          | 0.837 | 0.981 |
| Thyroid         | 1352              | 33            | 25             | 0                          | 0     | 0      | 5    | 0      | 0       | 0      | 0                  | 2   | 0    | 1    | 0   | 6      | 0   | 300    | 0.830          | 0.963 | 0.973 |
| UAT             | 3856              | 126           | 50             | 1                          | 1     | 0      | 6    | 1      | 6       | 0      | 4                  | 44  | 0    | 0    | 13  | 12     | 0   | 300    | 0.881          | 0.760 | 0.989 |
| Urinary tract   | 1454              | 68            | 47             | 0                          | 0     | 0      | 3    | 0      | 2       | 0      | 9                  | 6   | 0    | 0    | 1   | 9      | 0   | 200    | 0.863          | 0.750 | 0.988 |
| Overall         | 87155             |               |                |                            |       |        |      |        |         |        |                    |     |      |      |     |        |     |        | 0.863          | 0.811 | 0.981 |

AG: autonomic ganglia; AUC: area under the ROC Curve; CNS: central nervous system; DxM: drug-mutation interaction term; GOx: biological process interaction; NSCLC: non-small cell lung cancer; PPI: protein-protein interaction; PWYx: pathway-pathway interaction; R<sup>2</sup>: coefficient of determination; REcx: reaction-reaction interaction; RMSE: root-mean-square error; UAT: upper aerodigestive tract; #IC<sub>50</sub>: the number of drug responses; #Nodes: the number of nodes in the first and second hidden layers of neural networks; #Tours: the number of times to restart the fitting process.

**Table S2** Prediction performances of using genomic fingerprints

| Cancer type     | #IC <sub>50</sub> | #All Features | #Drug Features | #Genomics Fingerprints | #Interaction Terms | #Nodes |     | #Tours | Performance    |       |
|-----------------|-------------------|---------------|----------------|------------------------|--------------------|--------|-----|--------|----------------|-------|
|                 |                   |               |                |                        |                    | 1st    | 2nd |        | R <sup>2</sup> | RMSE  |
| AG              | 2971              | 62            | 29             | 0                      | 33                 | 62     | 8   | 200    | 0.613          | 1.235 |
| Bone            | 3410              | 84            | 16             | 68                     | 0                  | 10     | 0   | 300    | 0.506          | 1.506 |
| Breast          | 4706              | 129           | 25             | 98                     | 6                  | 26     | 6   | 200    | 0.648          | 1.221 |
| CNS             | 4250              | 114           | 30             | 83                     | 1                  | 11     | 0   | 300    | 0.705          | 1.132 |
| Cervix          | 1044              | 37            | 3              | 34                     | 0                  | 7      | 0   | 200    | 0.252          | 1.879 |
| Endometrium     | 1073              | 33            | 3              | 30                     | 0                  | 11     | 4   | 200    | 0.252          | 1.858 |
| Haematopoietic  | 4204              | 119           | 20             | 82                     | 17                 | 11     | 0   | 200    | 0.636          | 1.452 |
| Kidney          | 2458              | 73            | 15             | 58                     | 0                  | 9      | 0   | 200    | 0.546          | 1.461 |
| Large intestine | 4628              | 141           | 24             | 111                    | 6                  | 12     | 0   | 300    | 0.648          | 1.269 |
| Liver           | 1348              | 48            | 11             | 33                     | 4                  | 7      | 0   | 200    | 0.620          | 1.286 |
| Lung (NSCLC)    | 9205              | 207           | 30             | 167                    | 10                 | 15     | 0   | 200    | 0.696          | 1.164 |
| Lung (others)   | 7206              | 162           | 26             | 134                    | 2                  | 30     | 6   | 200    | 0.681          | 1.137 |
| Lymphoid        | 13302             | 291           | 32             | 245                    | 14                 | 18     | 0   | 300    | 0.755          | 1.052 |
| Oesophagus      | 3337              | 91            | 18             | 73                     | 0                  | 10     | 0   | 200    | 0.639          | 1.289 |
| Ovary           | 3502              | 113           | 18             | 95                     | 0                  | 11     | 0   | 200    | 0.610          | 1.373 |
| Pancreas        | 2421              | 84            | 12             | 72                     | 0                  | 10     | 0   | 200    | 0.415          | 1.643 |
| Pleura          | 1431              | 36            | 5              | 31                     | 0                  | 11     | 4   | 200    | 0.253          | 1.738 |
| Skin            | 5732              | 132           | 27             | 104                    | 1                  | 12     | 0   | 200    | 0.641          | 1.375 |
| Soft tissue     | 1938              | 63            | 17             | 45                     | 1                  | 8      | 0   | 200    | 0.577          | 1.434 |
| Stomach         | 2327              | 83            | 19             | 50                     | 14                 | 20     | 5   | 200    | 0.691          | 1.157 |
| Thyroid         | 1352              | 33            | 8              | 24                     | 1                  | 6      | 0   | 300    | 0.488          | 1.672 |
| UAT             | 3856              | 126           | 44             | 60                     | 22                 | 12     | 0   | 300    | 0.729          | 1.147 |
| Urinary tract   | 1454              | 68            | 13             | 51                     | 4                  | 9      | 0   | 200    | 0.569          | 1.312 |
| Overall         | 87155             |               |                |                        |                    |        |     |        | 0.655          | 1.289 |

AG: autonomic ganglia; CNS: central nervous system; NSCLC: non-small cell lung cancer; R<sup>2</sup>: coefficient of determination; RMSE: root-mean-square error; UAT: upper aerodigestive tract; #IC<sub>50</sub>: the number of drug responses; #Nodes: the number of nodes in the first and second hidden layers of neural networks; #Tours: the number of times to restart the fitting process.

**Table S3** Prediction performances of using no drug-mutation interaction terms

| Cancer type     | #IC <sub>50</sub> | #All Features | #Drug Features | #Cancer features |        | #Interaction terms |      |      |     | #Nodes |     | #Tours | Performance    |       |
|-----------------|-------------------|---------------|----------------|------------------|--------|--------------------|------|------|-----|--------|-----|--------|----------------|-------|
|                 |                   |               |                | Residue          | Others | PPI                | RECx | PWYx | GOx | 1st    | 2nd |        | R <sup>2</sup> | RMSE  |
| AG              | 2971              | 62            | 36             | 0                | 11     | 15                 | 0    | 0    | 0   | 62     | 8   | 200    | 0.851          | 0.766 |
| Bone            | 3410              | 84            | 58             | 0                | 13     | 11                 | 0    | 1    | 1   | 10     | 0   | 300    | 0.836          | 0.868 |
| Breast          | 4706              | 129           | 74             | 3                | 31     | 6                  | 1    | 9    | 5   | 26     | 6   | 200    | 0.880          | 0.712 |
| CNS             | 4250              | 114           | 74             | 0                | 28     | 2                  | 0    | 5    | 5   | 11     | 0   | 300    | 0.867          | 0.760 |
| Cervix          | 1044              | 37            | 31             | 0                | 2      | 4                  | 0    | 0    | 0   | 7      | 0   | 200    | 0.891          | 0.693 |
| Endometrium     | 1073              | 33            | 25             | 0                | 5      | 3                  | 0    | 0    | 0   | 11     | 4   | 200    | 0.807          | 0.925 |
| Haematopoietic  | 4204              | 119           | 76             | 4                | 27     | 3                  | 0    | 0    | 9   | 11     | 0   | 200    | 0.861          | 0.898 |
| Kidney          | 2458              | 73            | 53             | 0                | 4      | 15                 | 0    | 0    | 1   | 9      | 0   | 200    | 0.750          | 1.088 |
| Large intestine | 4628              | 141           | 76             | 20               | 25     | 11                 | 7    | 2    | 0   | 12     | 0   | 300    | 0.837          | 0.863 |
| Liver           | 1348              | 48            | 35             | 0                | 5      | 7                  | 0    | 0    | 1   | 7      | 0   | 200    | 0.777          | 0.981 |
| Lung (NSCLC)    | 9205              | 207           | 80             | 36               | 36     | 26                 | 0    | 9    | 20  | 15     | 0   | 200    | 0.726          | 1.107 |
| Lung (others)   | 7206              | 162           | 80             | 12               | 21     | 27                 | 0    | 9    | 13  | 30     | 6   | 200    | 0.892          | 0.660 |
| Lymphoid        | 13302             | 291           | 80             | 123              | 34     | 45                 | 5    | 0    | 4   | 18     | 0   | 300    | 0.892          | 0.697 |
| Oesophagus      | 3337              | 91            | 64             | 0                | 14     | 10                 | 0    | 2    | 1   | 10     | 0   | 200    | 0.830          | 0.882 |
| Ovary           | 3502              | 113           | 69             | 2                | 14     | 18                 | 2    | 6    | 2   | 11     | 0   | 200    | 0.850          | 0.852 |
| Pancreas        | 2421              | 84            | 60             | 0                | 7      | 13                 | 0    | 3    | 1   | 10     | 0   | 200    | 0.839          | 0.862 |
| Pleura          | 1431              | 36            | 25             | 0                | 4      | 7                  | 0    | 0    | 0   | 11     | 4   | 200    | 0.701          | 1.104 |
| Skin            | 5732              | 132           | 63             | 15               | 28     | 10                 | 2    | 7    | 7   | 12     | 0   | 200    | 0.864          | 0.846 |
| Soft tissue     | 1938              | 63            | 46             | 0                | 11     | 5                  | 0    | 1    | 0   | 8      | 0   | 200    | 0.728          | 1.166 |
| Stomach         | 2327              | 83            | 58             | 2                | 18     | 4                  | 0    | 0    | 1   | 20     | 5   | 200    | 0.874          | 0.731 |
| Thyroid         | 1352              | 33            | 25             | 0                | 5      | 2                  | 0    | 1    | 0   | 6      | 0   | 300    | 0.653          | 1.362 |
| UAT             | 3856              | 126           | 50             | 1                | 14     | 54                 | 0    | 0    | 7   | 12     | 0   | 300    | 0.881          | 0.757 |
| Urinary tract   | 1454              | 68            | 54             | 0                | 5      | 9                  | 0    | 0    | 0   | 9      | 0   | 200    | 0.854          | 0.765 |
| Overall         | 87155             |               |                |                  |        |                    |      |      |     |        |     |        | 0.846          | 0.862 |

AG: autonomic ganglia; CNS: central nervous system; PPI: protein-protein interaction; GOx: biological process interaction; NSCLC: non-small cell lung cancer; PWYx: pathway-pathway interaction; R<sup>2</sup>: coefficient of determination; RECx: reaction-reaction interaction; RMSE: root-mean-square error; UAT: upper aerodigestive tract; #IC<sub>50</sub>: the number of drug responses; #Nodes: the number of nodes in the first and second hidden layers of neural networks; #Tours: the number of times to restart the fitting process.

**Table S4** Prediction performances of using no interaction terms

| Cancer type     | #IC <sub>50</sub> | #All Features | #Drug Features | #Cancer features |        | #Nodes |     | #Tours | Performance    |       |
|-----------------|-------------------|---------------|----------------|------------------|--------|--------|-----|--------|----------------|-------|
|                 |                   |               |                | Residue          | Others | 1st    | 2nd |        | R <sup>2</sup> | RMSE  |
| AG              | 2971              | 62            | 39             | 0                | 23     | 62     | 8   | 200    | 0.861          | 0.74  |
| Bone            | 3410              | 84            | 59             | 0                | 25     | 10     | 0   | 300    | 0.692          | 1.189 |
| Breast          | 4706              | 129           | 77             | 9                | 43     | 26     | 6   | 200    | 0.901          | 0.649 |
| CNS             | 4250              | 114           | 72             | 0                | 42     | 11     | 0   | 300    | 0.745          | 1.052 |
| Cervix          | 1044              | 37            | 29             | 0                | 8      | 7      | 0   | 200    | 0.867          | 0.767 |
| Endometrium     | 1073              | 33            | 25             | 0                | 8      | 11     | 4   | 200    | 0.698          | 1.18  |
| Haematopoietic  | 4204              | 119           | 71             | 14               | 34     | 11     | 0   | 200    | 0.877          | 0.844 |
| Kidney          | 2458              | 73            | 47             | 5                | 21     | 9      | 0   | 200    | 0.783          | 1.016 |
| Large intestine | 4628              | 141           | 73             | 38               | 30     | 12     | 0   | 300    | 0.732          | 1.106 |
| Liver           | 1348              | 48            | 38             | 1                | 9      | 7      | 0   | 200    | 0.842          | 0.841 |
| Lung (NSCLC)    | 9205              | 207           | 80             | 31               | 96     | 15     | 0   | 200    | 0.831          | 0.867 |
| Lung (others)   | 7206              | 162           | 78             | 6                | 78     | 30     | 6   | 200    | 0.898          | 0.64  |
| Lymphoid        | 13302             | 291           | 80             | 116              | 95     | 18     | 0   | 300    | 0.814          | 0.915 |
| Oesophagus      | 3337              | 91            | 59             | 0                | 32     | 10     | 0   | 200    | 0.745          | 1.082 |
| Ovary           | 3502              | 113           | 75             | 4                | 34     | 11     | 0   | 200    | 0.701          | 1.204 |
| Pancreas        | 2421              | 84            | 63             | 0                | 21     | 10     | 0   | 200    | 0.856          | 0.815 |
| Pleura          | 1431              | 36            | 25             | 0                | 11     | 11     | 4   | 200    | 0.824          | 0.852 |
| Skin            | 5732              | 132           | 68             | 11               | 53     | 12     | 0   | 200    | 0.887          | 0.771 |
| Soft tissue     | 1938              | 63            | 44             | 0                | 19     | 8      | 0   | 200    | 0.816          | 0.955 |
| Stomach         | 2327              | 83            | 52             | 5                | 26     | 20     | 5   | 200    | 0.783          | 0.974 |
| Thyroid         | 1352              | 33            | 27             | 0                | 6      | 6      | 0   | 300    | 0.696          | 1.293 |
| UAT             | 3856              | 126           | 55             | 21               | 50     | 12     | 0   | 300    | 0.744          | 1.113 |
| Urinary tract   | 1454              | 68            | 54             | 1                | 13     | 9      | 0   | 200    | 0.581          | 1.301 |
| Overall         | 87155             |               |                |                  |        |        |     |        | 0.817          | 0.940 |

AG: autonomic ganglia; CNS: central nervous system; NSCLC: non-small cell lung cancer; R<sup>2</sup>: coefficient of determination; RMSE: root-mean-square error; UAT: upper aerodigestive tract; #IC<sub>50</sub>: the number of drug responses; #Nodes: the number of nodes in the first and second hidden layers of neural networks; #Tours: the number of times to restart the fitting process.

**Table S5** Pathway enrichment analysis

| PANTHER pathway                                                   | Reference list | Observed | Expected | Fold enrichment | P-value  | FDR      |
|-------------------------------------------------------------------|----------------|----------|----------|-----------------|----------|----------|
| Angiogenesis                                                      | 173            | 6        | 0.38     | 15.83           | 2.46E-06 | 2.02E-04 |
| Ras Pathway                                                       | 74             | 4        | 0.16     | 24.67           | 2.53E-05 | 8.31E-04 |
| Inflammation mediated by chemokine and cytokine signaling pathway | 260            | 6        | 0.57     | 10.53           | 2.36E-05 | 9.69E-04 |
| PDGF signaling pathway                                            | 148            | 5        | 0.32     | 15.42           | 2.05E-05 | 1.12E-03 |
| Wnt signaling pathway                                             | 312            | 5        | 0.68     | 7.31            | 6.21E-04 | 1.70E-02 |
| JAK/STAT signaling pathway                                        | 17             | 2        | 0.04     | 53.7            | 7.81E-04 | 1.83E-02 |
| Cytoskeletal regulation by Rho GTPase                             | 87             | 3        | 0.19     | 15.74           | 1.01E-03 | 2.06E-02 |
| Axon guidance mediated by Slit/Robo                               | 26             | 2        | 0.06     | 35.11           | 1.70E-03 | 3.11E-02 |
| Interferon-gamma signaling pathway                                | 29             | 2        | 0.06     | 31.48           | 2.09E-03 | 3.42E-02 |
| Apoptosis signaling pathway                                       | 118            | 3        | 0.26     | 11.6            | 2.35E-03 | 3.51E-02 |
| EGF receptor signaling pathway                                    | 134            | 3        | 0.29     | 10.22           | 3.34E-03 | 4.57E-02 |

FDR: false discovery rate.



**Table S6** Drug-mutation interaction terms and their impact on IC<sub>50</sub> in NSCLC cells

| Interaction term                     | IC <sub>50</sub> impact | IC <sub>50</sub> impact |
|--------------------------------------|-------------------------|-------------------------|
| PKA_102_CSV_X.Fingerprint_714        | -1.8652                 | 1.8652                  |
| PKA_260_HYD_X.Fingerprint_819        | -1.5855                 | 1.5855                  |
| PKA_247_HYD_X.Fingerprint_685        | 1.0754                  | 1.0754                  |
| PKA_200_HYD_X.Fingerprint_673        | 0.7291                  | 0.7291                  |
| PKA_197_B62_X.Fingerprint_576        | 0.5091                  | 0.5091                  |
| <b>PKA_187_CHA_X.Fingerprint_791</b> | <b>-0.4563</b>          | <b>0.4563</b>           |
| PKA_112_POL_X.Fingerprint_659        | -0.4440                 | 0.4440                  |
| PKA_244_ENG_X.Fingerprint_576        | 0.3811                  | 0.3811                  |
| PKA_73_ENG_X.Fingerprint_611         | 0.3802                  | 0.3802                  |
| PKA_73_POL_X.Fingerprint_611         | 0.3772                  | 0.3772                  |
| PKA_187_POL_X.Fingerprint_791        | 0.3621                  | 0.3621                  |
| PKA_226_HYD_X.Fingerprint_576        | 0.3613                  | 0.3613                  |
| PKA_293_X.Fingerprint_611            | 0.2765                  | 0.2765                  |
| PKA_187_B62_X.Fingerprint_826        | 0.2702                  | 0.2702                  |
| PKA_293_X.Fingerprint_647            | -0.2575                 | 0.2575                  |
| PKA_229_EXP_X.Fingerprint_576        | 0.2542                  | 0.2542                  |
| PKA_197_EXP_X.Fingerprint_576        | 0.2540                  | 0.2540                  |
| PKA_142_X.Fingerprint_611            | -0.2385                 | 0.2385                  |
| PKA_229_HYD_X.Fingerprint_576        | 0.2296                  | 0.2296                  |
| PKA_270_POL_X.Fingerprint_576        | 0.2009                  | 0.2009                  |
| PKA_270_HYD_X.Fingerprint_611        | 0.1979                  | 0.1979                  |
| PKA_260_POL_X.Fingerprint_819        | 0.1119                  | 0.1119                  |
| PKA_283_POL_X.Fingerprint_647        | -0.1099                 | 0.1099                  |
| PKA_280_ENG_X.Fingerprint_646        | 0.1027                  | 0.1027                  |
| PKA_226_X.Fingerprint_644            | 0.0963                  | 0.0963                  |
| PKA_293_EXP_X.Fingerprint_363        | -0.0886                 | 0.0886                  |
| PKA_73_ENG_X.Fingerprint_644         | 0.0852                  | 0.0852                  |
| PKA_216_ASA_X.Fingerprint_646        | -0.0618                 | 0.0618                  |
| PKA_73_EXP_X.Fingerprint_702         | -0.0443                 | 0.0443                  |
| PKA_102_VOL_X.Fingerprint_714        | -0.0433                 | 0.0433                  |
| PKA_283_POL_X.Fingerprint_644        | -0.0403                 | 0.0403                  |
| PKA_160_HYD_X.Fingerprint_696        | -0.0346                 | 0.0346                  |
| PKA_175_ENG_X.Fingerprint_685        | 0.0342                  | 0.0342                  |
| PKA_270_EXP_X.Fingerprint_611        | 0.0276                  | 0.0276                  |
| PKA_252_ASA_X.Fingerprint_646        | -0.0227                 | 0.0227                  |
| PKA_283_ASA_X.Fingerprint_576        | 0.0202                  | 0.0202                  |
| PKA_187_ASA_X.Fingerprint_791        | -0.0192                 | 0.0192                  |
| PKA_283_ASA_X.Fingerprint_647        | 0.0119                  | 0.0119                  |
| PKA_197_VOL_X.Fingerprint_702        | 0.0118                  | 0.0118                  |
| PKA_197_ASA_X.Fingerprint_798        | 0.0097                  | 0.0097                  |
| <b>PKA_187_VOL_X.Fingerprint_826</b> | <b>-0.0090</b>          | <b>0.0090</b>           |
| PKA_123_VOL_X.Fingerprint_363        | -0.0079                 | 0.0079                  |
| PKA_77_ASA_X.Fingerprint_714         | -0.0055                 | 0.0055                  |
| PKA_73_CHA_X.Fingerprint_714         | -0.0027                 | 0.0027                  |
| PKA_283_VOL_X.Fingerprint_673        | -0.0024                 | 0.0024                  |
| PKA_283_ASA_X.Fingerprint_644        | -0.0023                 | 0.0023                  |
| PKA_270_VOL_X.Fingerprint_673        | -0.0004                 | 0.0004                  |

The features illustrated in Figure 4 are highlighted in bold.

**Table S7** Comparison between full training sets' features and reduced sets' features

|                 | All selected features |             |         |      | Selected interaction terms |             |         |       |
|-----------------|-----------------------|-------------|---------|------|----------------------------|-------------|---------|-------|
|                 | Full set              | Reduced set | Overlap |      | Full set                   | Reduced set | Overlap |       |
|                 |                       |             | Count   | %*   |                            |             | Count   | %*    |
| AG              | 62                    | 44          | 43      | 69.4 | 22                         | 14          | 14      | 63.6  |
| Bone            | 84                    | 81          | 74      | 88.1 | 19                         | 20          | 17      | 89.5  |
| Breast          | 129                   | 136         | 108     | 83.7 | 28                         | 30          | 20      | 71.4  |
| CNS             | 114                   | 102         | 90      | 78.9 | 26                         | 22          | 18      | 69.2  |
| Cervix          | 37                    | 32          | 31      | 83.8 | 5                          | 3           | 3       | 60.0  |
| Endometrium     | 33                    | 26          | 22      | 66.7 | 8                          | 6           | 5       | 62.5  |
| Haematopoietic  | 119                   | 137         | 98      | 82.4 | 34                         | 41          | 20      | 58.8  |
| Kidney          | 73                    | 64          | 58      | 79.5 | 19                         | 18          | 15      | 78.9  |
| Large intestine | 141                   | 152         | 120     | 85.1 | 64                         | 61          | 54      | 84.4  |
| Liver           | 48                    | 32          | 31      | 64.6 | 9                          | 6           | 6       | 66.7  |
| Lung (NSCLC)    | 207                   | 201         | 174     | 84.1 | 93                         | 98          | 78      | 83.9  |
| Lung (others)   | 162                   | 166         | 130     | 80.2 | 86                         | 93          | 63      | 73.3  |
| Lymphoid        | 291                   | 262         | 223     | 76.6 | 135                        | 124         | 107     | 79.3  |
| Oesophagus      | 91                    | 96          | 78      | 85.7 | 16                         | 22          | 11      | 68.8  |
| Ovary           | 113                   | 118         | 102     | 90.3 | 29                         | 29          | 24      | 82.8  |
| Pancreas        | 84                    | 87          | 77      | 91.7 | 17                         | 19          | 13      | 76.5  |
| Pleura          | 36                    | 43          | 32      | 88.9 | 8                          | 7           | 6       | 75.0  |
| Skin            | 132                   | 99          | 91      | 68.9 | 38                         | 28          | 23      | 60.5  |
| Soft tissue     | 63                    | 59          | 55      | 87.3 | 8                          | 8           | 8       | 100.0 |
| Stomach         | 83                    | 73          | 62      | 74.7 | 21                         | 16          | 13      | 61.9  |
| Thyroid         | 33                    | 32          | 31      | 93.9 | 3                          | 3           | 3       | 100.0 |
| UAT             | 126                   | 127         | 106     | 84.1 | 61                         | 58          | 44      | 72.1  |
| Urinary tract   | 68                    | 68          | 60      | 88.2 | 16                         | 15          | 12      | 75.0  |
| Overall         | 2329                  | 2237        | 1896    | 81.4 | 765                        | 741         | 577     | 75.4  |

%\*: defined by the overlap count dividing the full set's feature count.

**Table S8** Prediction performances of the QSMART model with neural networks in reduced sets

| Cancer type     | #IC <sub>50</sub> | #All Features | #Drug Features | #Cancer features |        | #Interactions |        | #Nodes |     | #Tours | Performance    |       |
|-----------------|-------------------|---------------|----------------|------------------|--------|---------------|--------|--------|-----|--------|----------------|-------|
|                 |                   |               |                | Residue          | Others | DxM           | Others | 1st    | 2nd |        | R <sup>2</sup> | RMSE  |
| AG              | 2674              | 44            | 27             | 0                | 3      | 1             | 13     | 44     | 7   | 200    | 0.823          | 0.824 |
| Bone            | 3069              | 81            | 48             | 0                | 13     | 4             | 16     | 9      | 0   | 300    | 0.824          | 0.906 |
| Breast          | 4236              | 136           | 75             | 0                | 31     | 14            | 16     | 27     | 6   | 200    | 0.9            | 0.648 |
| CNS             | 3825              | 102           | 56             | 0                | 24     | 9             | 13     | 11     | 0   | 300    | 0.885          | 0.703 |
| Cervix          | 940               | 32            | 25             | 0                | 4      | 1             | 2      | 6      | 0   | 200    | 0.82           | 0.891 |
| Endometrium     | 966               | 26            | 17             | 0                | 3      | 4             | 2      | 9      | 3   | 200    | 0.766          | 1.023 |
| Haematopoietic  | 3784              | 137           | 64             | 5                | 27     | 33            | 8      | 12     | 0   | 200    | 0.83           | 0.994 |
| Kidney          | 2213              | 64            | 41             | 0                | 5      | 0             | 18     | 8      | 0   | 200    | 0.731          | 1.132 |
| Large intestine | 4166              | 152           | 64             | 15               | 12     | 47            | 14     | 13     | 0   | 300    | 0.826          | 0.891 |
| Liver           | 1214              | 32            | 23             | 0                | 3      | 1             | 5      | 7      | 0   | 200    | 0.792          | 0.953 |
| Lung (NSCLC)    | 8285              | 201           | 68             | 2                | 33     | 44            | 54     | 15     | 0   | 200    | 0.846          | 0.828 |
| Lung (others)   | 6486              | 166           | 56             | 3                | 14     | 48            | 45     | 31     | 6   | 200    | 0.871          | 0.72  |
| Lymphoid        | 11972             | 262           | 71             | 46               | 21     | 72            | 52     | 17     | 0   | 300    | 0.863          | 0.783 |
| Oesophagus      | 3004              | 96            | 58             | 0                | 16     | 6             | 16     | 10     | 0   | 200    | 0.885          | 0.733 |
| Ovary           | 3152              | 118           | 70             | 3                | 16     | 9             | 20     | 11     | 0   | 200    | 0.729          | 1.143 |
| Pancreas        | 2179              | 87            | 60             | 0                | 8      | 0             | 19     | 10     | 0   | 200    | 0.675          | 1.236 |
| Pleura          | 1288              | 43            | 32             | 0                | 4      | 0             | 7      | 13     | 4   | 200    | 0.877          | 0.698 |
| Skin            | 5159              | 99            | 49             | 2                | 20     | 8             | 20     | 10     | 0   | 200    | 0.806          | 1.018 |
| Soft tissue     | 1745              | 59            | 41             | 0                | 10     | 2             | 6      | 8      | 0   | 200    | 0.838          | 0.894 |
| Stomach         | 2095              | 73            | 42             | 3                | 12     | 11            | 5      | 18     | 5   | 200    | 0.839          | 0.824 |
| Thyroid         | 1217              | 32            | 24             | 0                | 5      | 0             | 3      | 6      | 0   | 300    | 0.831          | 0.96  |
| UAT             | 3471              | 127           | 52             | 1                | 16     | 6             | 52     | 12     | 0   | 300    | 0.767          | 1.067 |
| Urinary tract   | 1309              | 68            | 48             | 0                | 5      | 7             | 8      | 9      | 0   | 200    | 0.851          | 0.766 |
| Overall         | 78449             |               |                |                  |        |               |        |        |     |        | 0.839          | 0.881 |

AG: autonomic ganglia; CNS: central nervous system; DxM: drug-mutation interaction term; NSCLC: non-small cell lung cancer; R<sup>2</sup>: coefficient of determination; RMSE: root-mean-square error; UAT: upper aerodigestive tract; #IC<sub>50</sub>: the number of drug responses; #Nodes: the number of nodes in the first and second hidden layers of neural networks; #Tours: the number of times to restart the fitting process.

Table S9 Cancer cell line features

| Feature level | Feature                    | Nomenclature            | Value                                                                                                                        |
|---------------|----------------------------|-------------------------|------------------------------------------------------------------------------------------------------------------------------|
| Residue       | PKA position               | PKA_[POSITION]          | $x_i = \sum_{k=1}^K M_{ki} \omega, \omega = \{1, CSV_{ki}, EXP_k\}$                                                          |
|               | Mutant type                | PKA_[POSITION]_[MT]     | $x_{im} = \sum_{k=1}^K M_{kim} \omega, \omega = \{1, CSV_{ki}, EXP_k\}$                                                      |
|               | Charge                     | PKA_[POSITION]_[CHA]    | $x_i = \sum_{k=1}^K C_{ki}$                                                                                                  |
|               | Polarity                   | PKA_[POSITION]_[POL]    | $x_i = \sum_{k=1}^K P_{ki}$                                                                                                  |
|               | Hydrophobicity             | PKA_[POSITION]_[HYD]    | $x_i = \sum_{k=1}^K H_{ki}$                                                                                                  |
|               | Accessible surface area    | PKA_[POSITION]_[ASA]    | $x_i = \sum_{k=1}^K A_{ki}$                                                                                                  |
|               | Side-chain volume          | PKA_[POSITION]_[VOL]    | $x_i = \sum_{k=1}^K V_{ki}$                                                                                                  |
|               | Energy per residue         | PKA_[POSITION]_[ENG]    | $x_i = \sum_{k=1}^K E_{ki}$                                                                                                  |
|               | Substitution score         | PKA_[POSITION]_[B62]    | $x_i = \sum_{k=1}^K S_{ki}$                                                                                                  |
| Motif         | Sequence motif             | MOT_2D_[NAME]           | $x_t = \sum_{k=1}^K \sum_{n=1}^{N_k} M_{kn} L_t(k, n) \omega, \omega = \{1, CSV_{kn}, EXP_k\}$                               |
|               | Structural motif           | MOT_3D_[NAME]           | $x_T = \sum_{k=1}^K \sum_{n=1}^{N_k} M_{kn} L_T(k, n) \omega, \omega = \{1, CSV_{kn}, EXP_k\}$                               |
| Domain        | Subdomain                  | SDOM_[NAME]             | $x_d = \sum_{k=1}^K \sum_{n=1}^{N_k} M_{kn} L_d(k, n) \omega, \omega = \{1, CSV_{kn}, EXP_k\}$                               |
|               | Functional domain          | DOM_[NAME]              | $x_D = \sum_{k=1}^K \sum_{n=1}^{N_k} M_{kn} L_D(k, n) \omega, \omega = \{1, CSV_{kn}, EXP_k\}$                               |
| Gene          | Mutation                   | MUT_[GENE]              | $x_k = M_k \omega = \sum_{n=1}^{N_k} M_{kn} \omega, \omega = \{1, CSV_{kn}, EXP_k\}$                                         |
|               | Expression                 | EXP_[GENE]              | $x_k = EXP_k, \text{ from GDSC}$                                                                                             |
|               | Copy number variation      | CNV_[GENE]              | $x_k = CNV_k = \{gain, neutral, loss\}, \text{ from COSMIC}$                                                                 |
| Family        | Family                     | SFAM_[NAME]             | $x_f = \sum_{k=1}^K M_k F_f(k) \omega = \sum_{k=1}^K \sum_{n=1}^{N_k} M_{kn} F_f(k) \omega, \omega = \{1, CSV_{kn}, EXP_k\}$ |
|               | Group                      | FAM_[NAME]              | $x_g = \sum_{k=1}^K M_k G_g(k) \omega = \sum_{k=1}^K \sum_{n=1}^{N_k} M_{kn} G_g(k) \omega, \omega = \{1, CSV_{kn}, EXP_k\}$ |
| Pathway       | Reaction                   | REC_[REACTOME.ID]       | $x_r = \sum_{k=1}^K M_k R_r(k) \omega = \sum_{k=1}^K \sum_{n=1}^{N_k} M_{kn} R_r(k) \omega, \omega = \{1, CSV_{kn}, EXP_k\}$ |
|               | Pathway                    | PWY_[REACTOME.ID]       | $x_w = \sum_{k=1}^K M_k W_w(k) \omega = \sum_{k=1}^K \sum_{n=1}^{N_k} M_{kn} W_w(k) \omega, \omega = \{1, CSV_{kn}, EXP_k\}$ |
|               | Biological process         | GO_[GO.ID]              | $x_b = \sum_{k=1}^K M_k B_b(k) \omega = \sum_{k=1}^K \sum_{n=1}^{N_k} M_{kn} B_b(k) \omega, \omega = \{1, CSV_{kn}, EXP_k\}$ |
| Sample        | Primary site               | CLS_Primary_site        | From COSMIC                                                                                                                  |
|               | Site subtype 1             | CLS_Site_subtype_1      |                                                                                                                              |
|               | Site subtype 2             | CLS_Site_subtype_2      |                                                                                                                              |
|               | Site subtype 3             | CLS_Site_subtype_3      |                                                                                                                              |
|               | Primary histology          | CLS_Primary_histology   |                                                                                                                              |
|               | Histology subtype 1        | CLS_Histology_subtype_1 |                                                                                                                              |
|               | Histology subtype 2        | CLS_Histology_subtype_2 |                                                                                                                              |
|               | Histology subtype 3        | CLS_Histology_subtype_3 |                                                                                                                              |
|               | Microsatellite instability | CLS_msi                 |                                                                                                                              |
|               | Average ploidy             | CLS_average_ploidy      |                                                                                                                              |
|               | Tumour source              | CLS_tumour_source       |                                                                                                                              |
|               | Age                        | CLS_age                 |                                                                                                                              |
|               | Gender                     | CLS_gender              |                                                                                                                              |
|               | NCI code                   | CLS_NCI_code            |                                                                                                                              |

$M_{ki}$ : if the residue of protein kinase  $k$  aligned to PKA position  $i$  is mutated (1) or not (0);  $CSV_{ki}$ : the conservation score of the residue of protein kinase  $k$  aligned to PKA position  $i$ ;  $EXP_k$ : the gene expression level of protein kinase  $k$ ;  $M_{kim}$ : if the residue of protein kinase  $k$  aligned to PKA position  $i$  is mutated to the amino acid type  $m$  (1) or not (0);  $C_{ki}$ ,  $P_{ki}$ ,  $H_{ki}$ ,  $A_{ki}$ ,  $V_{ki}$ , or  $E_{ki}$ : respectively mean the charge, polarity, hydrophobicity, accessible surface area, side-chain volume, or energy differences caused by the mutated residue of protein kinase  $k$  aligned to PKA position  $i$ ;  $S_{ki}$ : the BLOSUM62 substitution score of the mutated residue of protein kinase  $k$  aligned to PKA position  $i$ ;  $N_k$ : the length of protein kinase  $k$  sequence;  $M_{kn}$ : if the  $n$ th residue of protein kinase  $k$  is mutated (1) or not (0);  $L_t(k, n)$ ,  $L_T(k, n)$ ,  $L_d(k, n)$ , or  $L_D(k, n)$ : respectively mean if the  $n$ th residue of protein kinase  $k$  is located in sequence motif  $t$ , structural motif  $T$ , subdomain  $d$ , or functional domain  $D$  (1) or not (0);  $CSV_{kn}$ : the conservation score of the  $n$ th residue of protein kinase  $k$ ;  $CNV_k$ : the copy number variation status of protein kinase  $k$ ;  $F_f(k)$  or  $G_g(k)$ : respectively mean if protein kinase  $k$  belongs to family  $f$  or group  $p$  (1) or not (0);  $R_r(k)$ ,  $W_w(k)$ , or  $B_b(k)$ : respectively mean if protein kinase  $k$  is implicated in reaction  $r$ , pathway  $w$ , or biological process  $b$  (1) or not (0); NCI code: National Cancer Institute (NCI) Thesaurus code.

**Table S10** Remaining drug features of feature screening with a reversed feature prioritization

| Drug feature    | VIF     |
|-----------------|---------|
| AlogP           | 4.72554 |
| Alogp2          | 4.11270 |
| AMR             | 4.99997 |
| BCUTw-1l        | 1.37218 |
| BCUTw-1h        | 1.54648 |
| BCUTc-1l        | 3.02942 |
| BCUTc-1h        | 2.78522 |
| BCUTp-1l        | 2.40230 |
| BCUTp-1h        | 2.11239 |
| PNSA-1          | 2.64945 |
| PNSA-3          | 4.54709 |
| RPCS            | 1.84704 |
| RNCS            | 1.91853 |
| Wlambda2.unity  | 2.65717 |
| Weta2.unity     | 1.30732 |
| Weta3.unity     | 1.78801 |
| nAcid           | 1.19615 |
| ATSc3           | 2.61343 |
| ATSc4           | 2.38344 |
| nBase           | 1.44670 |
| C1SP1           | 1.28125 |
| C2SP1           | 1.16451 |
| C4SP3           | 1.73272 |
| SCH-3           | 4.64373 |
| SCH-4           | 4.99948 |
| SCH-5           | 1.59229 |
| nHBDon          | 4.45565 |
| khs.dCH2        | 1.30666 |
| khs.ssS         | 1.50674 |
| Fingerprint_346 | 2.50190 |
| Fingerprint_476 | 1.63186 |
| Fingerprint_500 | 1.48860 |
| Fingerprint_820 | 1.56166 |

VIF: variance inflation factor.

**Table S11** Prediction performances of using split QSMART models with neural networks

| Cancer type     | #Nodes |   | Split QSMART models |                                |                  |                                  |             |                                       | Performance comparison         |                               |                                                                |
|-----------------|--------|---|---------------------|--------------------------------|------------------|----------------------------------|-------------|---------------------------------------|--------------------------------|-------------------------------|----------------------------------------------------------------|
|                 |        |   | Drug                |                                | Cancer cell line |                                  | Interaction |                                       | Full model                     | Split models                  | Difference                                                     |
|                 |        |   | #Features           | R <sup>2</sup> <sub>Drug</sub> | #Features        | R <sup>2</sup> <sub>Cancer</sub> | #Features   | R <sup>2</sup> <sub>Interaction</sub> | R <sup>2</sup> <sub>Full</sub> | R <sup>2</sup> <sub>SSP</sub> | R <sup>2</sup> <sub>Full</sub> - R <sup>2</sup> <sub>SSP</sub> |
| AG              | 62     | 8 | 31                  | 0.641                          | 9                | 0.042                            | 22          | 0.009                                 | 0.879                          | 0.692                         | 0.187                                                          |
| Stomach         | 20     | 5 | 49                  | 0.611                          | 13               | 0.053                            | 21          | 0.062                                 | 0.836                          | 0.726                         | 0.110                                                          |
| Breast          | 26     | 6 | 70                  | 0.629                          | 31               | 0.070                            | 28          | 0.073                                 | 0.880                          | 0.771                         | 0.109                                                          |
| Pleura          | 11     | 4 | 23                  | 0.614                          | 5                | 0.043                            | 8           | 0.061                                 | 0.805                          | 0.718                         | 0.088                                                          |
| Haematopoietic  | 11     | 0 | 58                  | 0.599                          | 27               | 0.092                            | 34          | 0.098                                 | 0.858                          | 0.789                         | 0.070                                                          |
| Oesophagus      | 10     | 0 | 58                  | 0.699                          | 17               | 0.027                            | 16          | 0.050                                 | 0.841                          | 0.776                         | 0.066                                                          |
| Soft tissue     | 8      | 0 | 45                  | 0.561                          | 10               | 0.100                            | 8           | 0.104                                 | 0.818                          | 0.765                         | 0.053                                                          |
| Cervix          | 7      | 0 | 65                  | 0.683                          | 23               | 0.072                            | 26          | 0.055                                 | 0.858                          | 0.810                         | 0.048                                                          |
| Liver           | 7      | 0 | 35                  | 0.652                          | 4                | 0.020                            | 9           | 0.126                                 | 0.836                          | 0.798                         | 0.038                                                          |
| Urinary tract   | 9      | 0 | 47                  | 0.673                          | 5                | 0.105                            | 16          | 0.048                                 | 0.863                          | 0.826                         | 0.037                                                          |
| Lung (NSCLC)    | 15     | 0 | 72                  | 0.610                          | 42               | 0.084                            | 93          | 0.128                                 | 0.854                          | 0.822                         | 0.031                                                          |
| Skin            | 12     | 0 | 64                  | 0.685                          | 30               | 0.041                            | 38          | 0.122                                 | 0.875                          | 0.848                         | 0.027                                                          |
| Bone            | 10     | 0 | 52                  | 0.607                          | 13               | 0.111                            | 19          | 0.112                                 | 0.856                          | 0.830                         | 0.026                                                          |
| Lung (others)   | 30     | 6 | 58                  | 0.610                          | 18               | 0.121                            | 86          | 0.104                                 | 0.859                          | 0.834                         | 0.024                                                          |
| UAT             | 12     | 0 | 50                  | 0.727                          | 15               | 0.062                            | 61          | 0.085                                 | 0.881                          | 0.873                         | 0.008                                                          |
| Pancreas        | 10     | 0 | 60                  | 0.717                          | 7                | 0.058                            | 17          | 0.061                                 | 0.833                          | 0.835                         | -0.002                                                         |
| Thyroid         | 6      | 0 | 25                  | 0.713                          | 5                | 0.067                            | 3           | 0.053                                 | 0.830                          | 0.833                         | -0.003                                                         |
| Endometrium     | 11     | 4 | 21                  | 0.709                          | 4                | 0.076                            | 8           | 0.099                                 | 0.878                          | 0.884                         | -0.006                                                         |
| Ovary           | 11     | 0 | 64                  | 0.648                          | 20               | 0.092                            | 29          | 0.122                                 | 0.844                          | 0.861                         | -0.017                                                         |
| Kidney          | 9      | 0 | 51                  | 0.666                          | 3                | 0.074                            | 19          | 0.126                                 | 0.836                          | 0.866                         | -0.030                                                         |
| Lymphoid        | 18     | 0 | 72                  | 0.661                          | 84               | 0.097                            | 135         | 0.149                                 | 0.873                          | 0.907                         | -0.034                                                         |
| CNS             | 11     | 0 | 29                  | 0.669                          | 3                | 0.033                            | 5           | 0.244                                 | 0.864                          | 0.946                         | -0.081                                                         |
| Large intestine | 12     | 0 | 53                  | 0.574                          | 24               | 0.160                            | 64          | 0.209                                 | 0.814                          | 0.943                         | -0.129                                                         |
| Overall         |        |   |                     | 0.663                          |                  | 0.126                            |             | 0.152                                 | 0.863                          | 0.940                         | -0.077                                                         |

R<sup>2</sup><sub>Full</sub>: the performance of using a full QSMART model with neural networks shown in Table S2; R<sup>2</sup><sub>SSP</sub>: the sum of split model performances (R<sup>2</sup><sub>SSP</sub> = R<sup>2</sup><sub>Drug</sub> + R<sup>2</sup><sub>Cancer</sub> + R<sup>2</sup><sub>Interaction</sub>). AG: autonomic ganglia; CNS: central nervous system; NSCLC: non-small cell lung cancer; UAT: upper aerodigestive tract; #Nodes: the number of nodes in the first and second hidden layers of neural networks.
